# Supplementary material for: Synthesis and characterization of pyrimidine-containing hexaarylbenzene derivatives
Source: Royal Society of Chemistry journal article supplement (doi:10.1039/c5ra18422c), 2015-01-01
Supplement: c5ra18422c1.pdf [file c5ra18422c1.pdf]

## Synthesis and characterization of pyrimidine-containing hexaarylbenzene derivatives

Dengqing Zhang\*<sup>[a]</sup>, Gang Wang<sup>[a]</sup>, Rong Li<sup>[a]</sup>, Xianying Li\*<sup>[b]</sup>, Yunjie Xiang<sup>[a]</sup>, Zhen Zhang<sup>[a]</sup>, Wusong Jin\*<sup>[a]</sup>

[a] College of Chemistry, Chemical Engineering and Biotechnology, Donghua University, 2999 North Renmin Road, Songjiang, Shanghai 201620, P. R. China

[b] School of Environmental Science and Engineering, Donghua University, 2999 North Renmin Road, Songjiang, Shanghai 201620, P. R. China

E-mail: [dqzhang@dhu.edu.cn](mailto:dqzhang@dhu.edu.cn); [seanlee@dhu.edu.cn](mailto:seanlee@dhu.edu.cn); [wsjin@dhu.edu.cn](mailto:wsjin@dhu.edu.cn)

### Supporting contents.

1. <sup>1</sup>H NMR, <sup>13</sup>C NMR and MALDI-TOF mass spectra (Figure S1-S19)
2. Photograph of TLC (Figure S20)

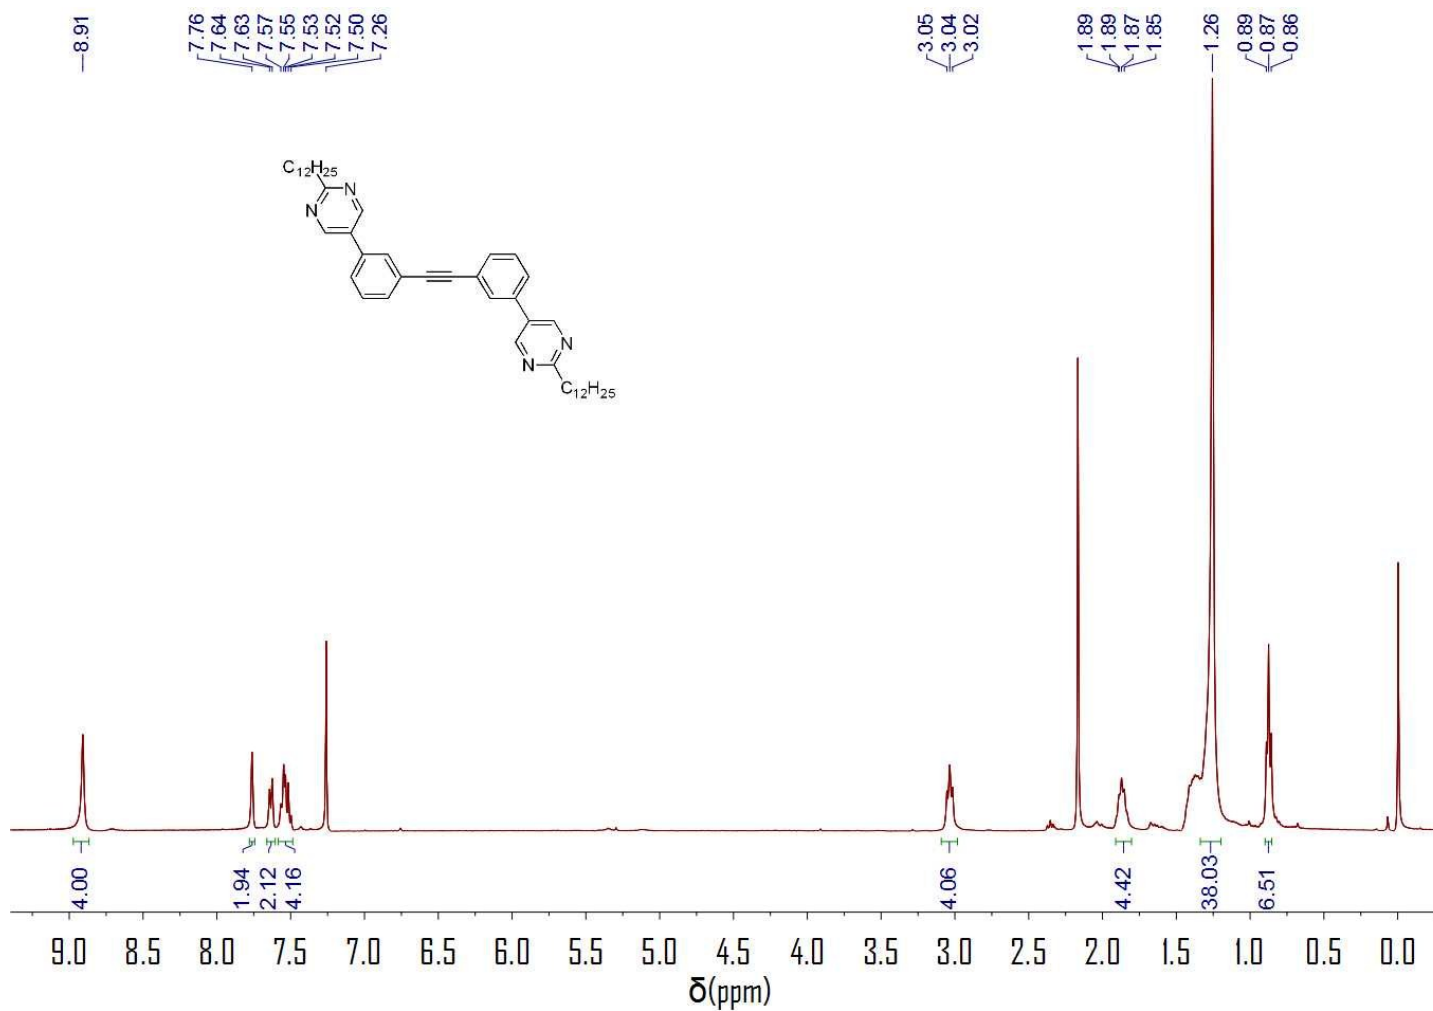

Figure S1.  $^1\text{H}$  NMR spectra of **6** (400 MHz,  $\text{CDCl}_3$ ).

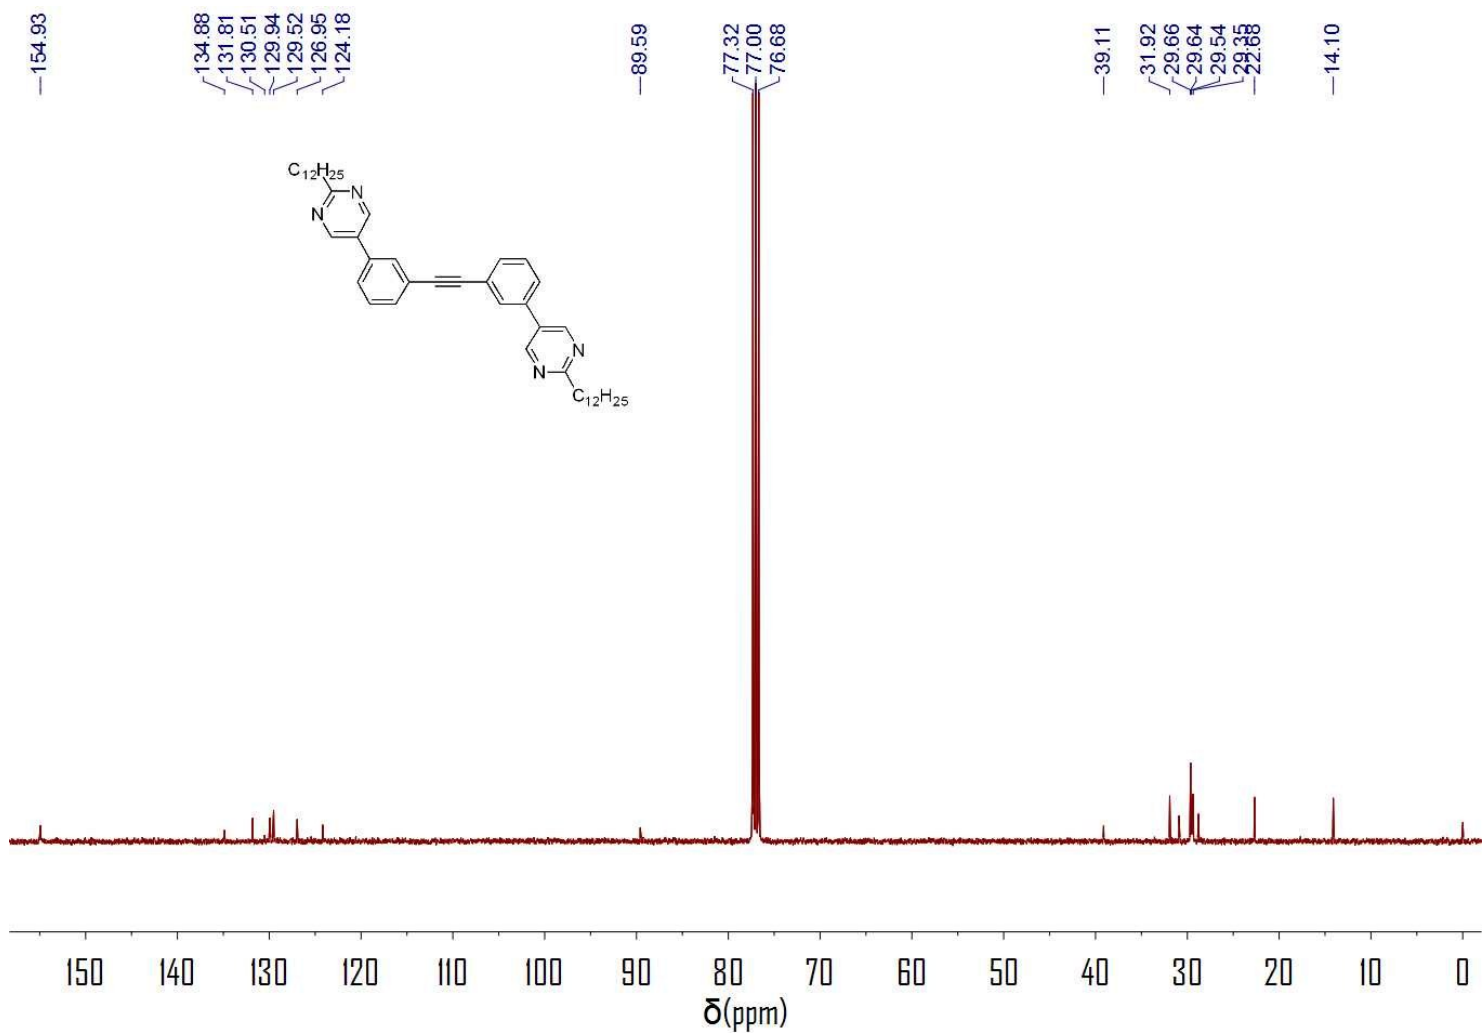

Figure S2.  $^{13}\text{C}$  NMR spectra of **6** (400 MHz,  $\text{CDCl}_3$ ).

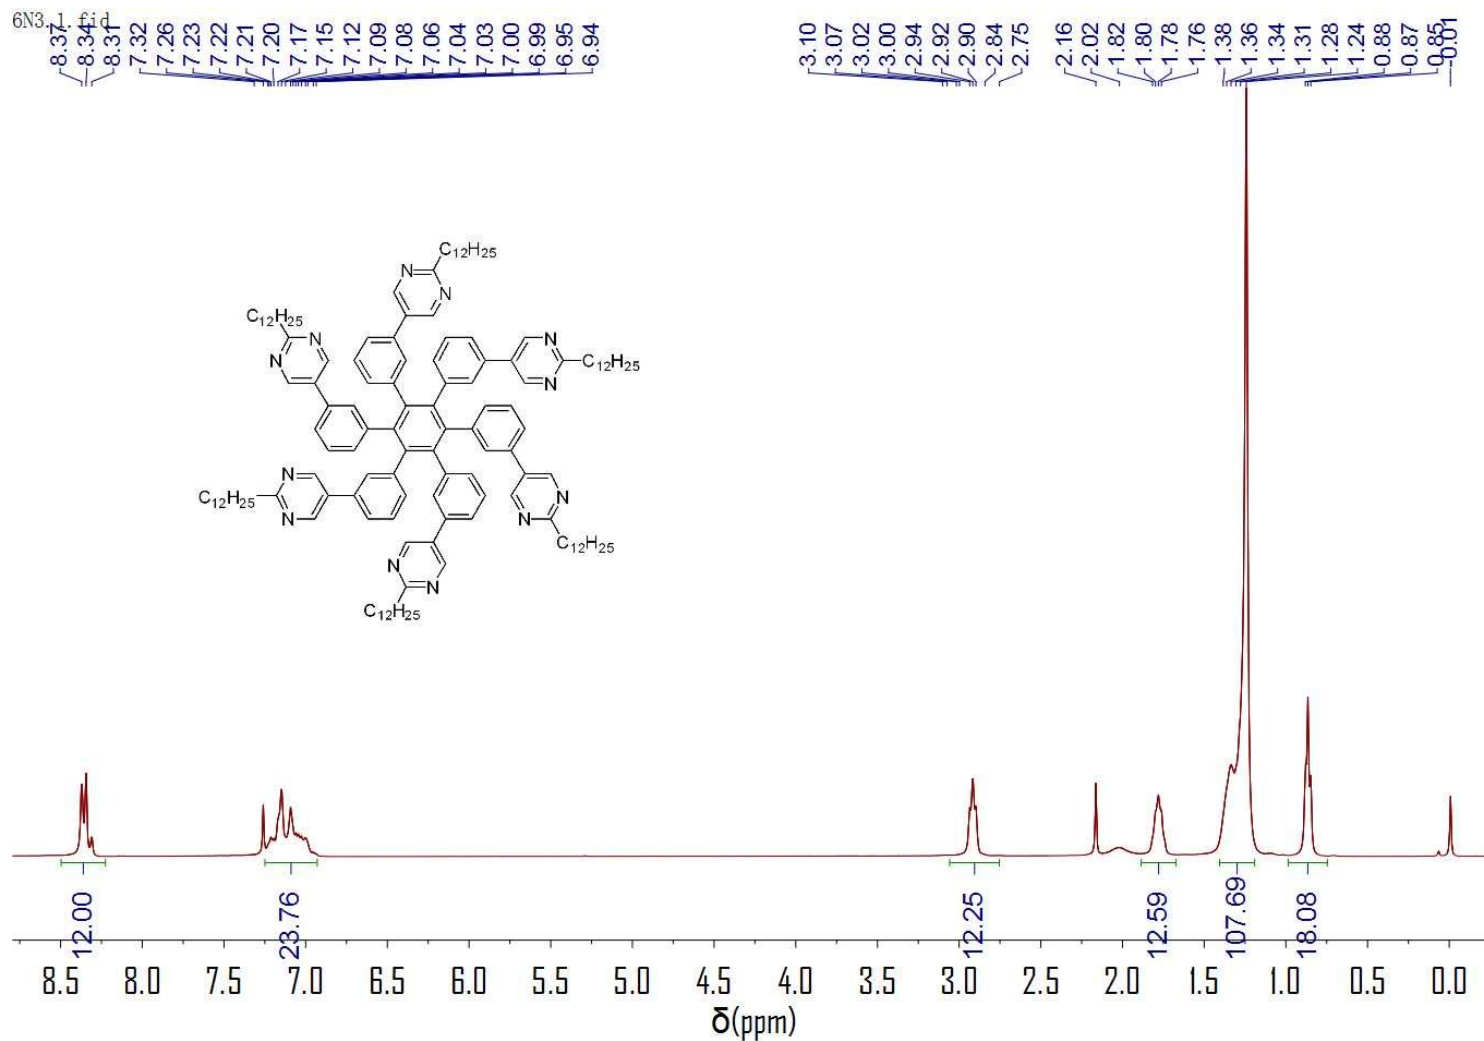

Figure S3.  $^1\text{H}$  NMR spectra of **1** (400 MHz,  $\text{CDCl}_3$ )

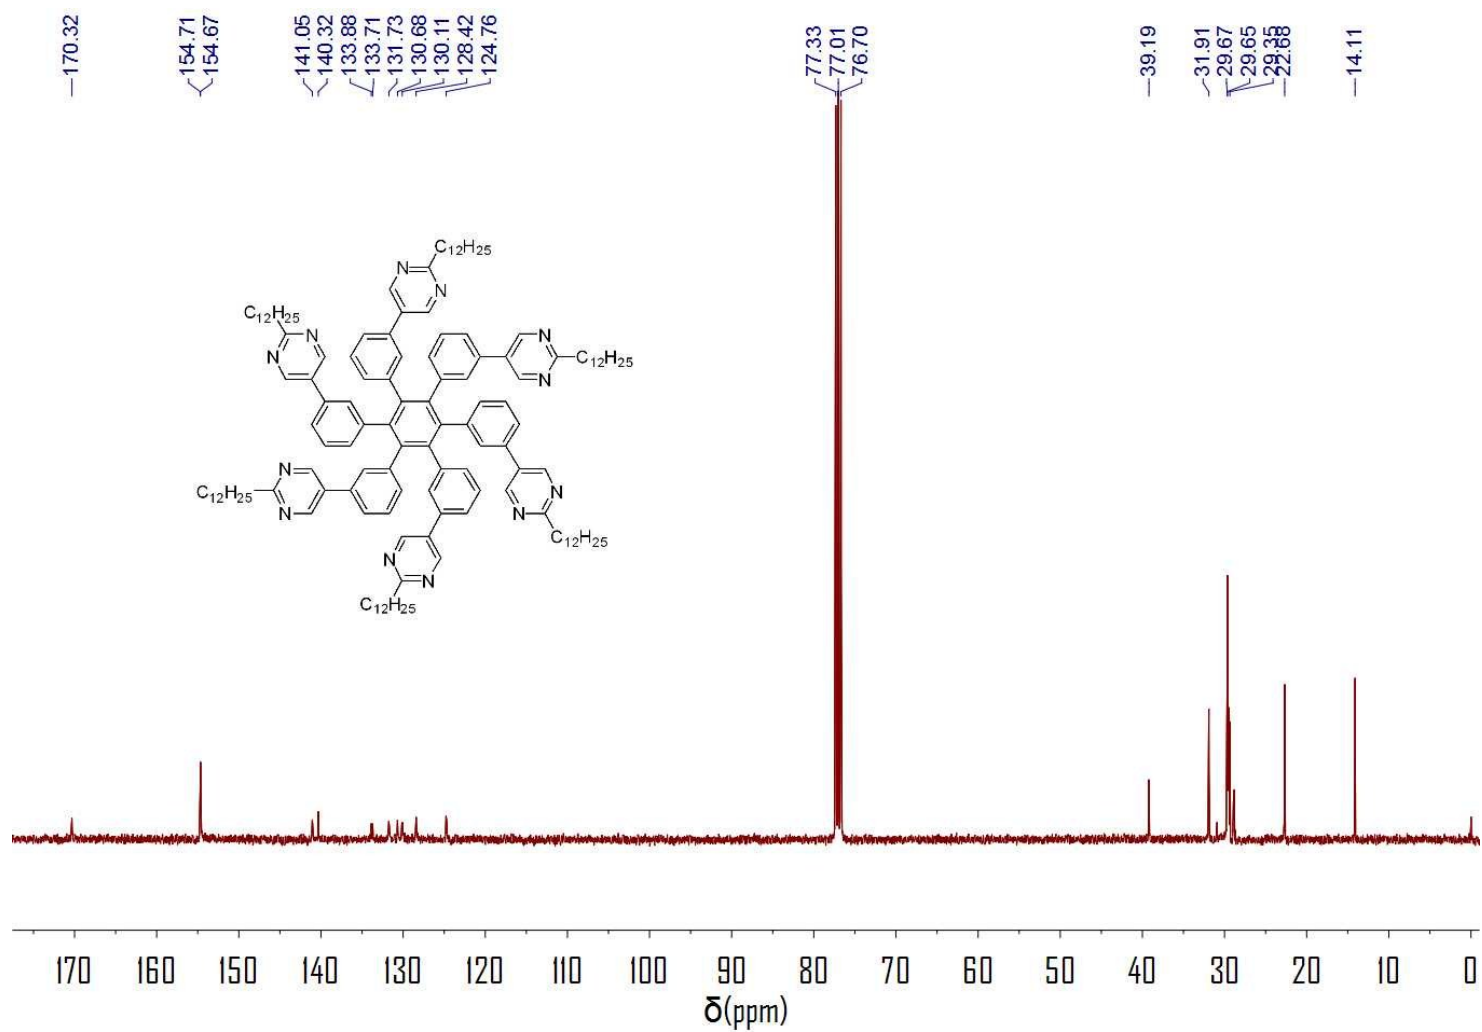

Figure S4.  $^{13}C$  NMR spectra of **1** (400 MHz,  $CDCl_3$ ).

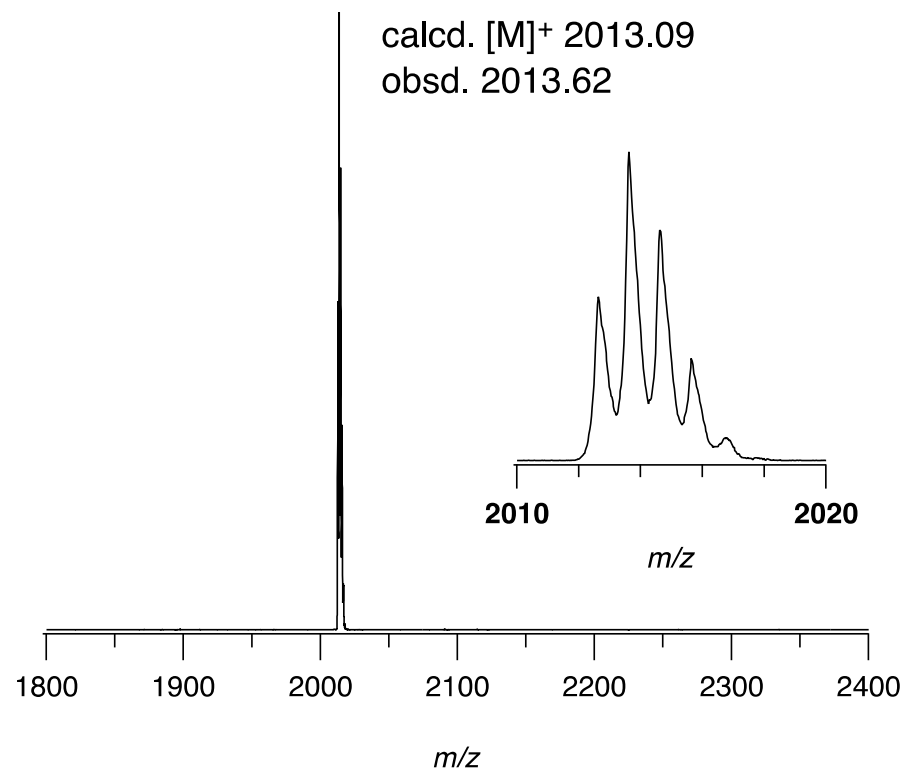

Figure S5. MALDI-TOF mass spectrum of **1**.

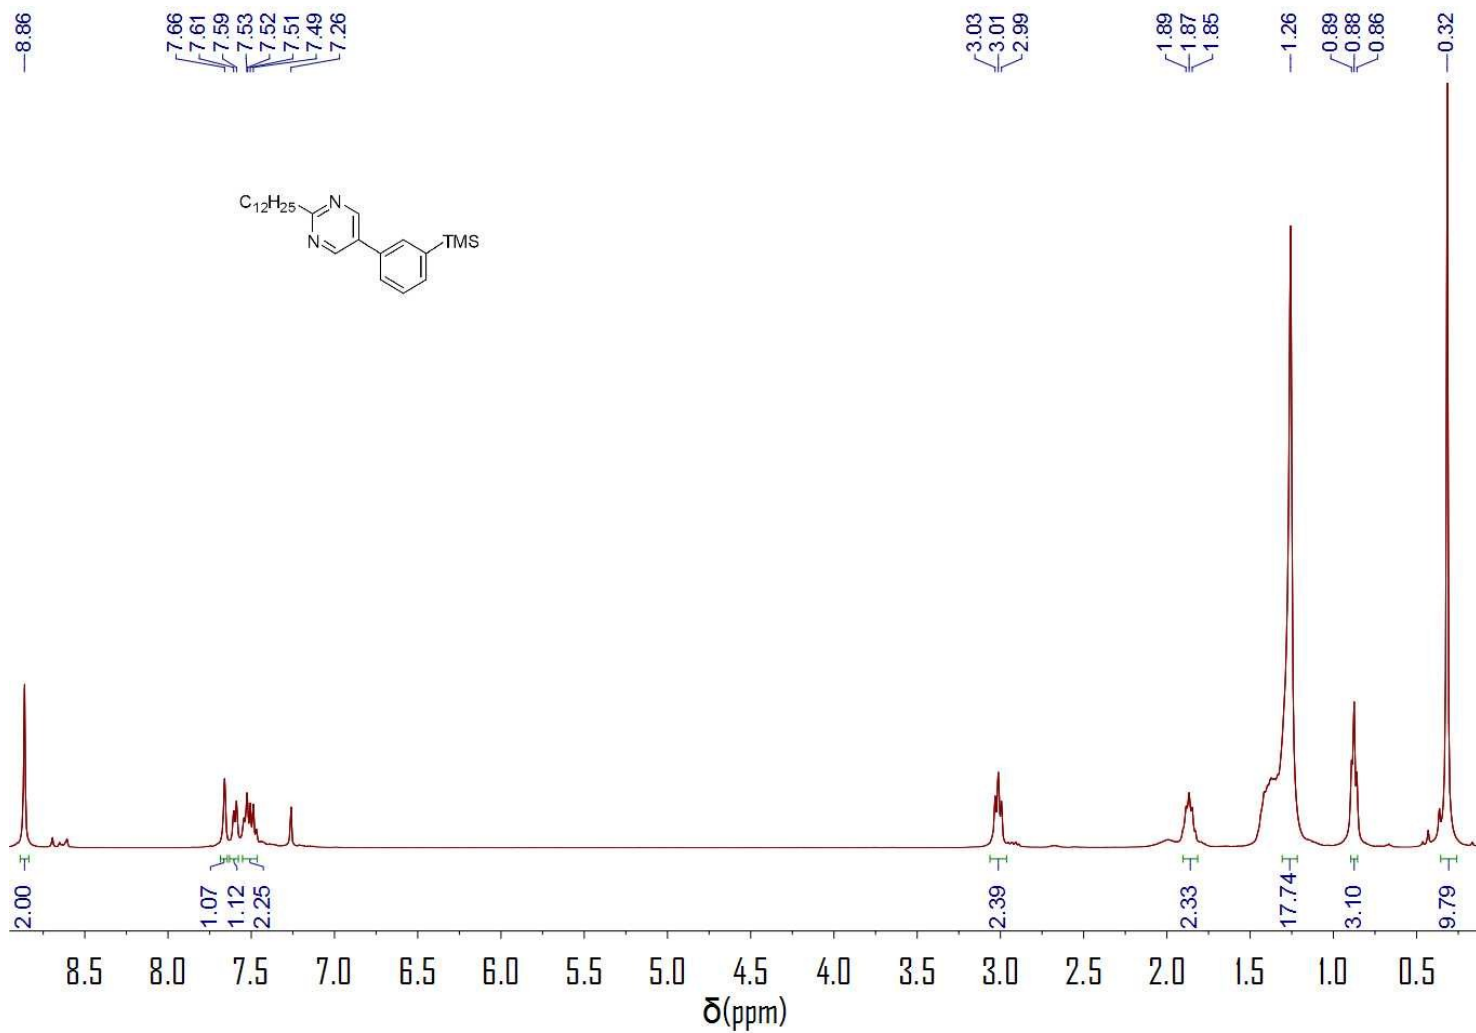

Figure S6.  $^1\text{H}$  NMR spectra of **9** (400 MHz,  $\text{CDCl}_3$ ).

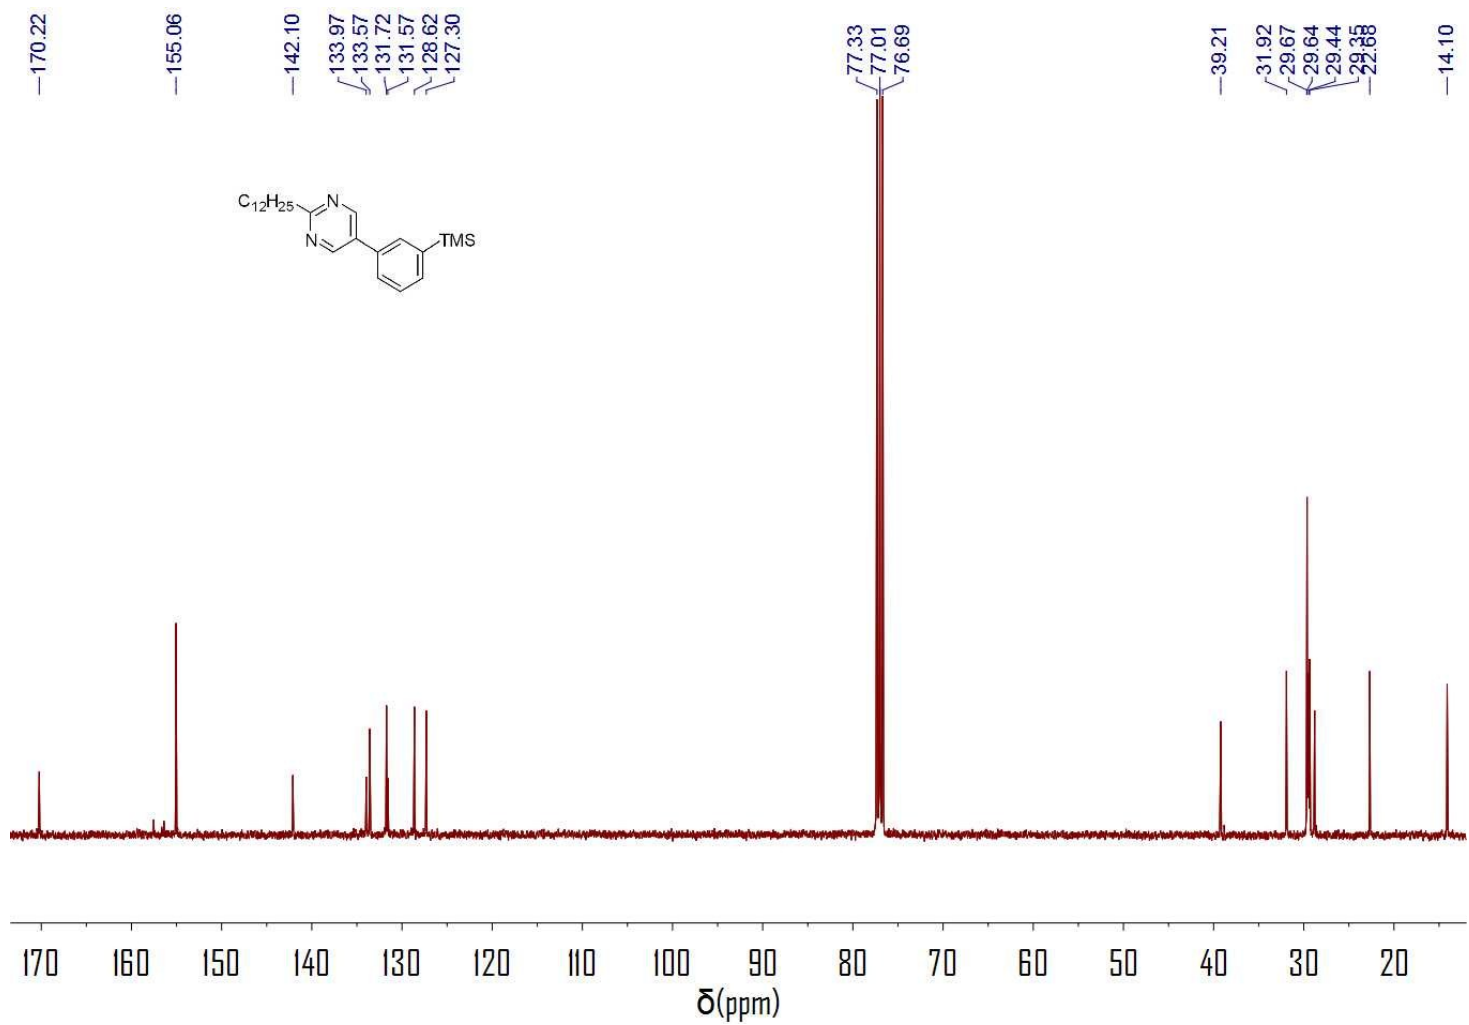

Figure S7.  $^{13}\text{C}$  NMR spectra of **9** (400 MHz,  $\text{CDCl}_3$ ).



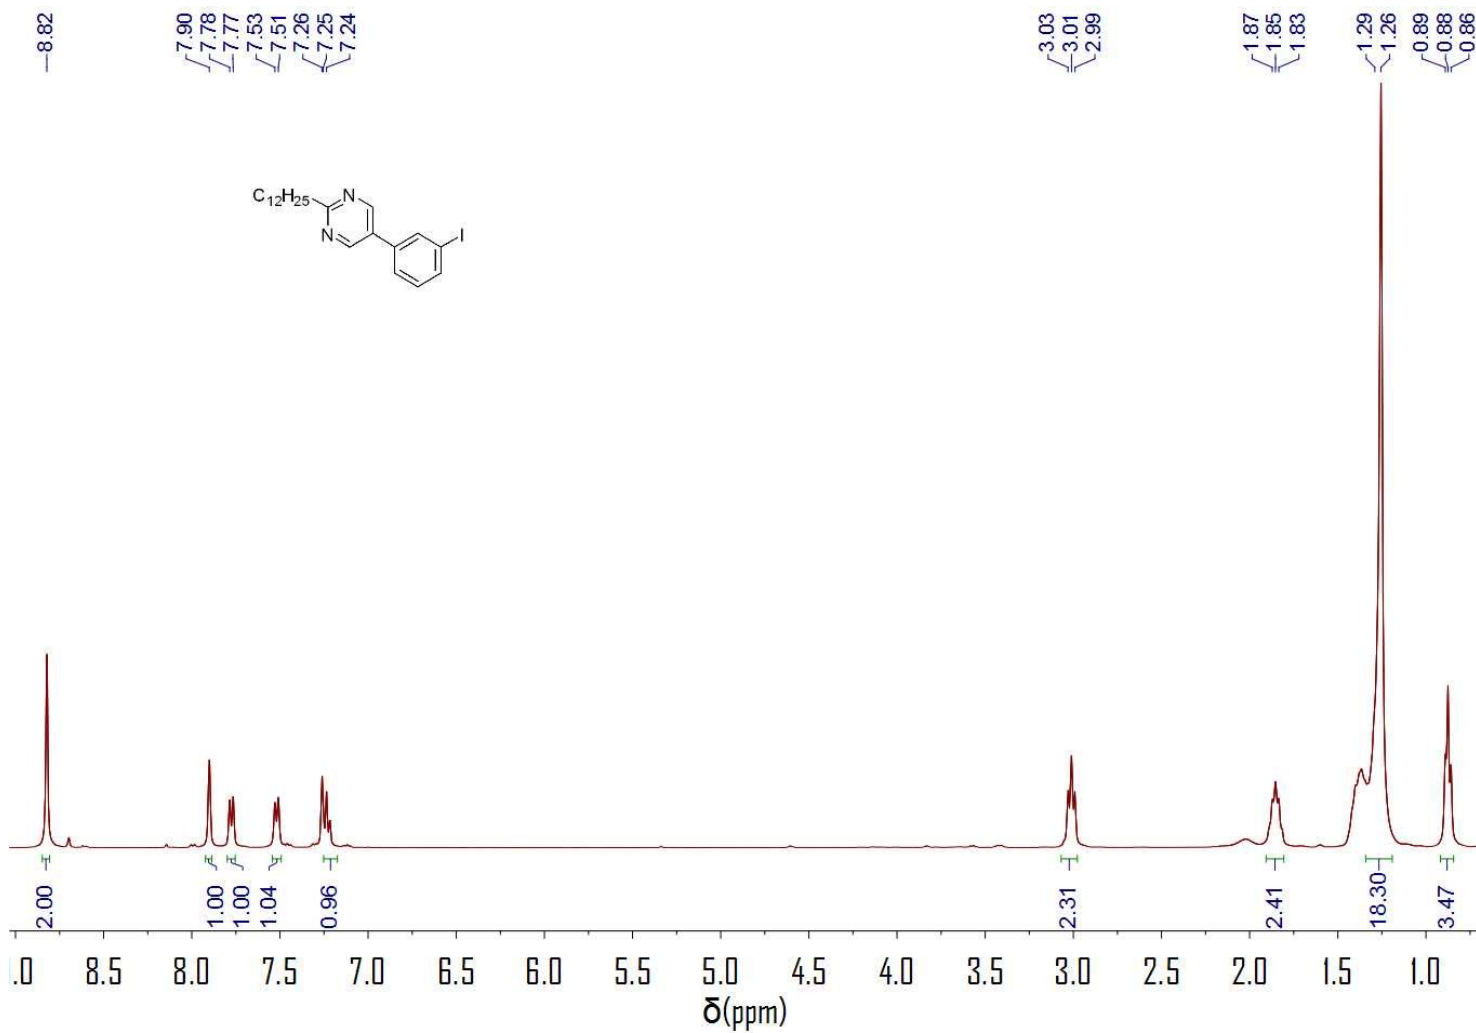

Figure S8.  $^1\text{H}$  NMR spectra of **10** (400 MHz,  $\text{CDCl}_3$ ).

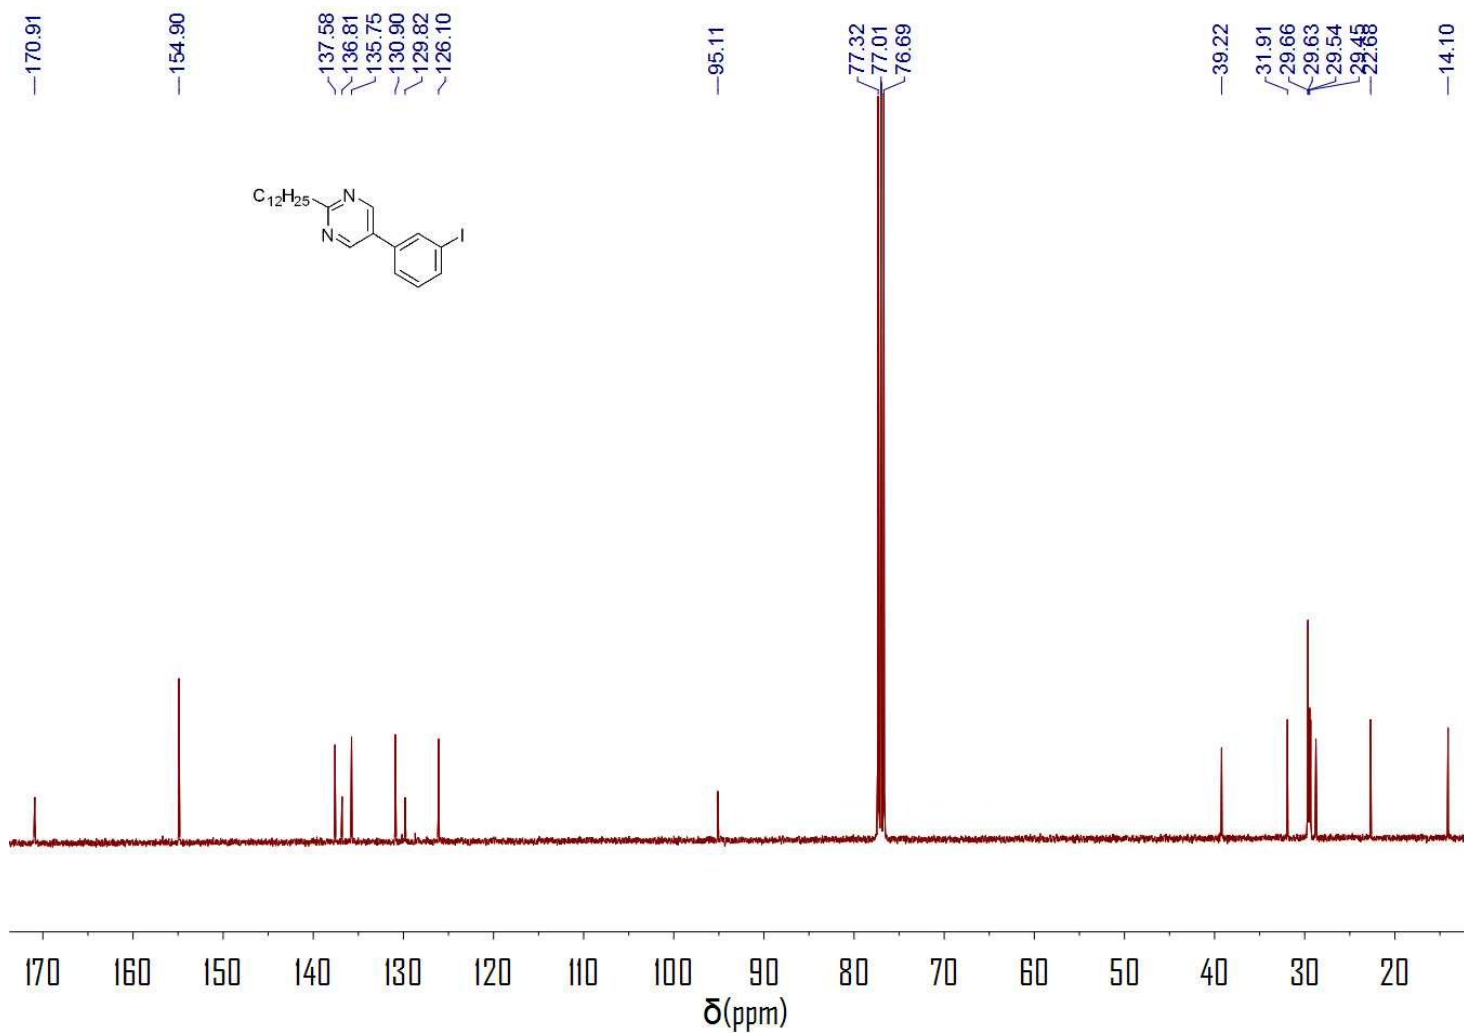

Figure S9.  $^{13}\text{C}$  NMR spectra of **10** (400 MHz,  $\text{CDCl}_3$ ).

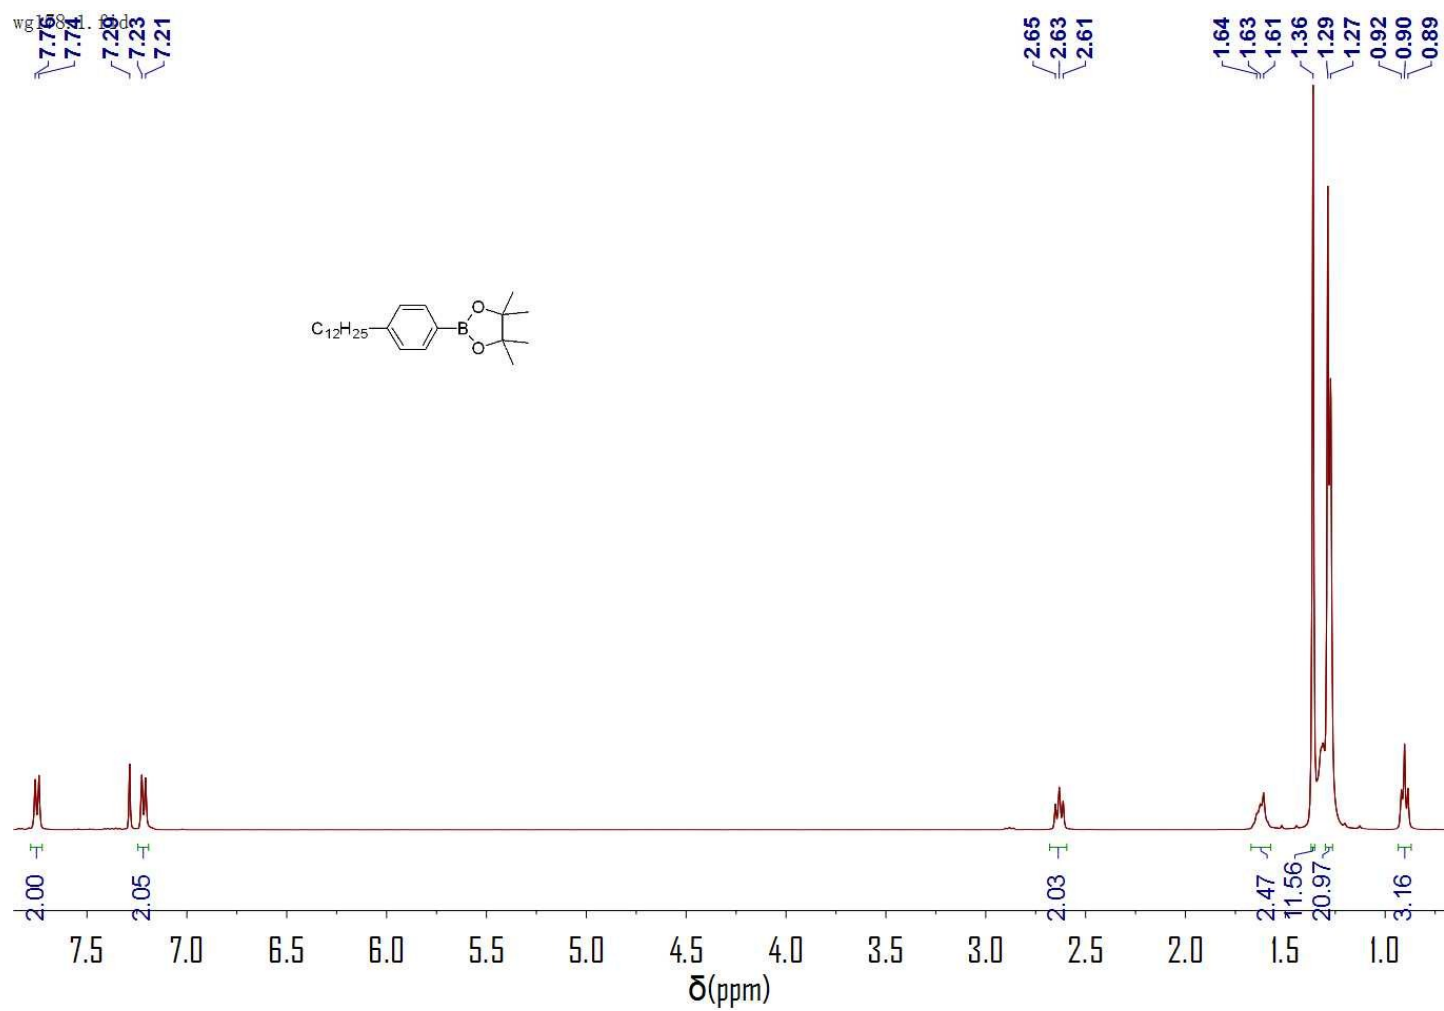

Figure S10.  $^1\text{H}$  NMR spectra of **11** (400 MHz,  $\text{CDCl}_3$ ).

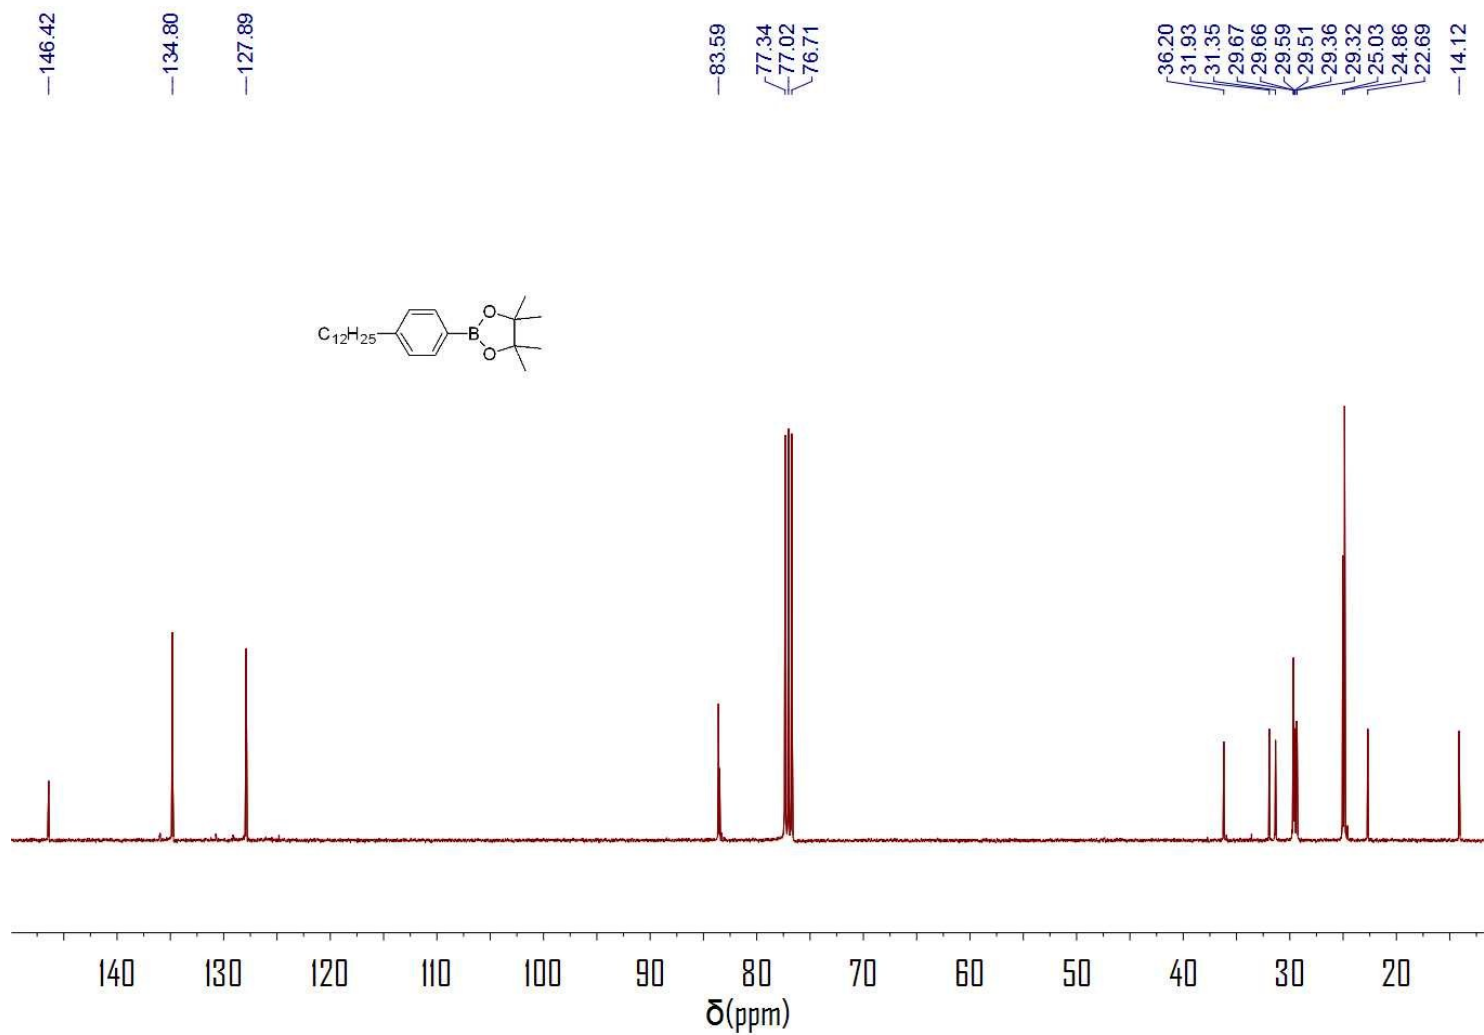

Figure S11.  $^{13}\text{C}$  NMR spectra of **11** (400 MHz,  $\text{CDCl}_3$ ).

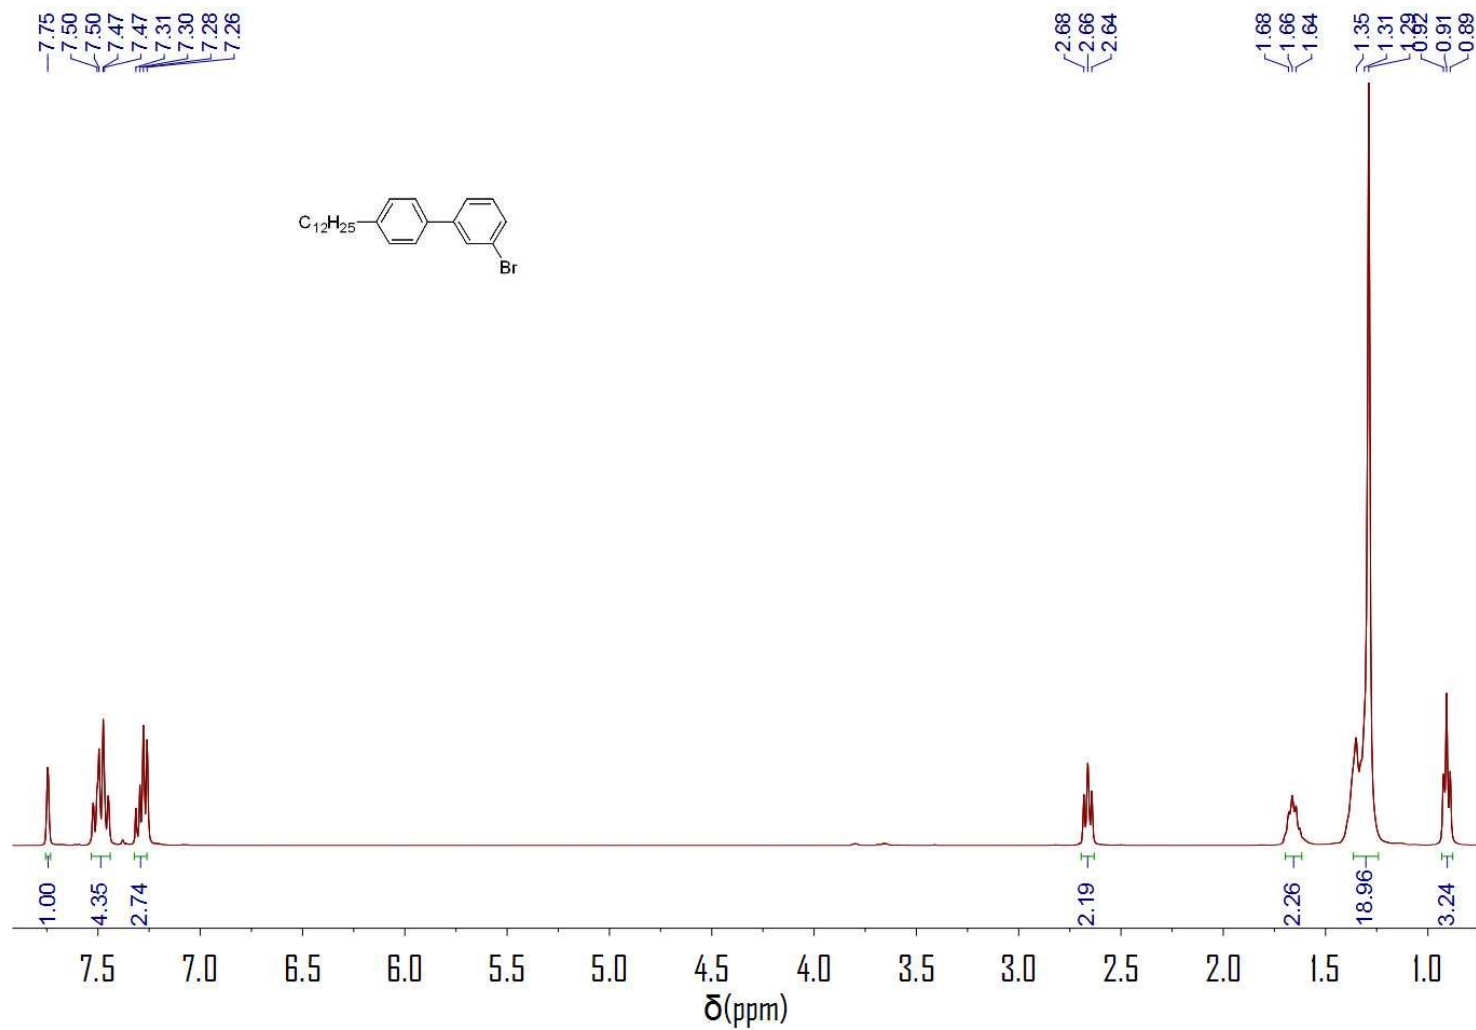

Figure S12.  $^1\text{H}$  NMR spectra of **12** (400 MHz,  $\text{CDCl}_3$ ).

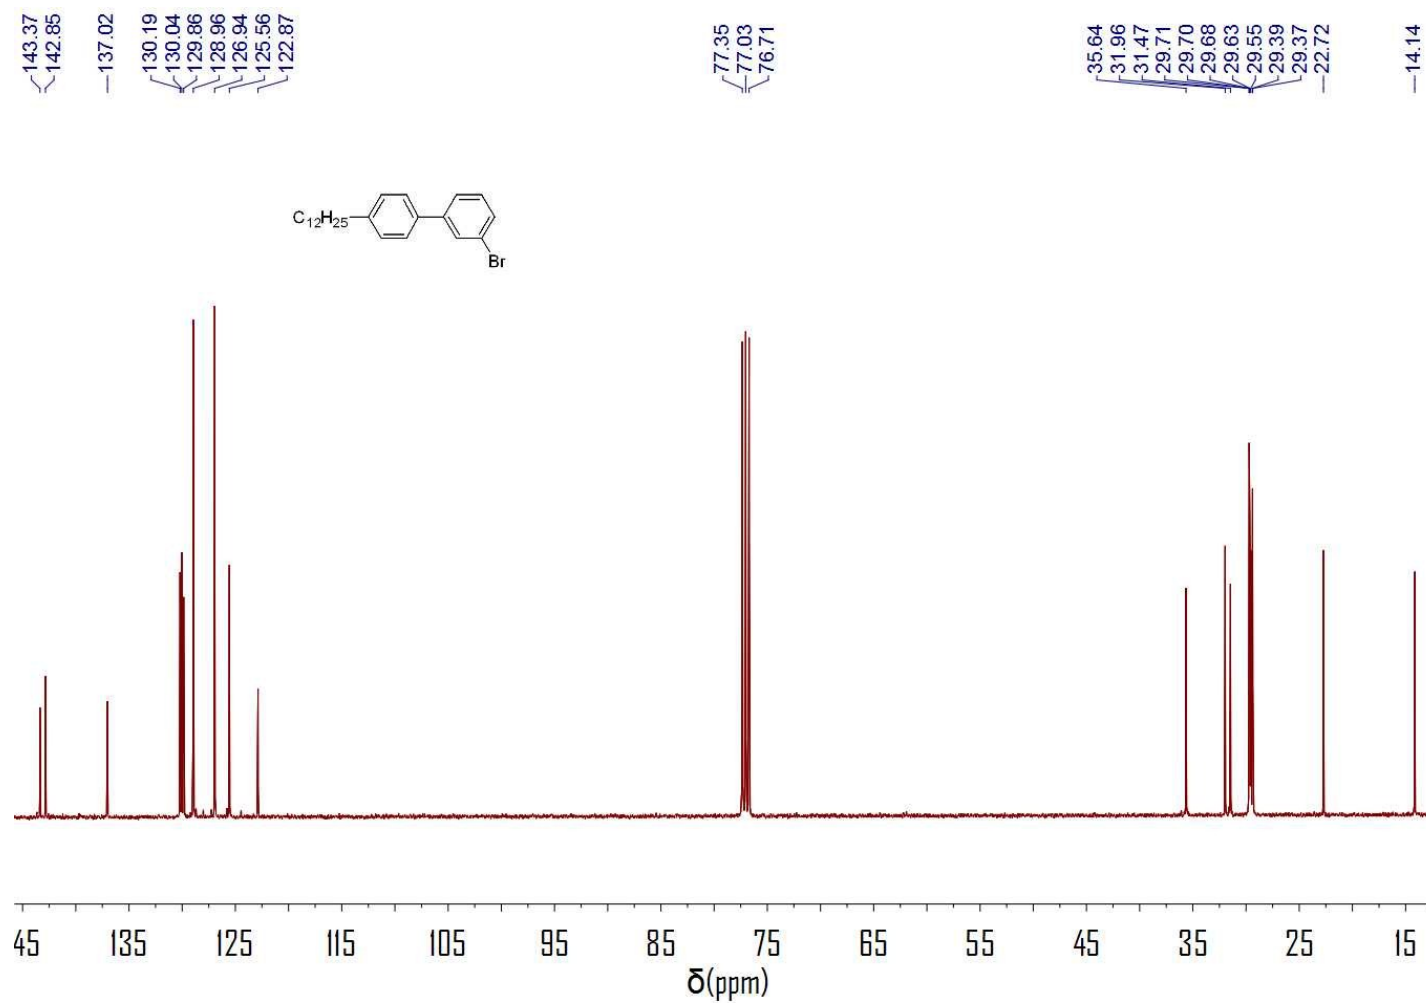

Figure S13.  $^{13}\text{C}$  NMR spectra of **12** (400 MHz,  $\text{CDCl}_3$ ).

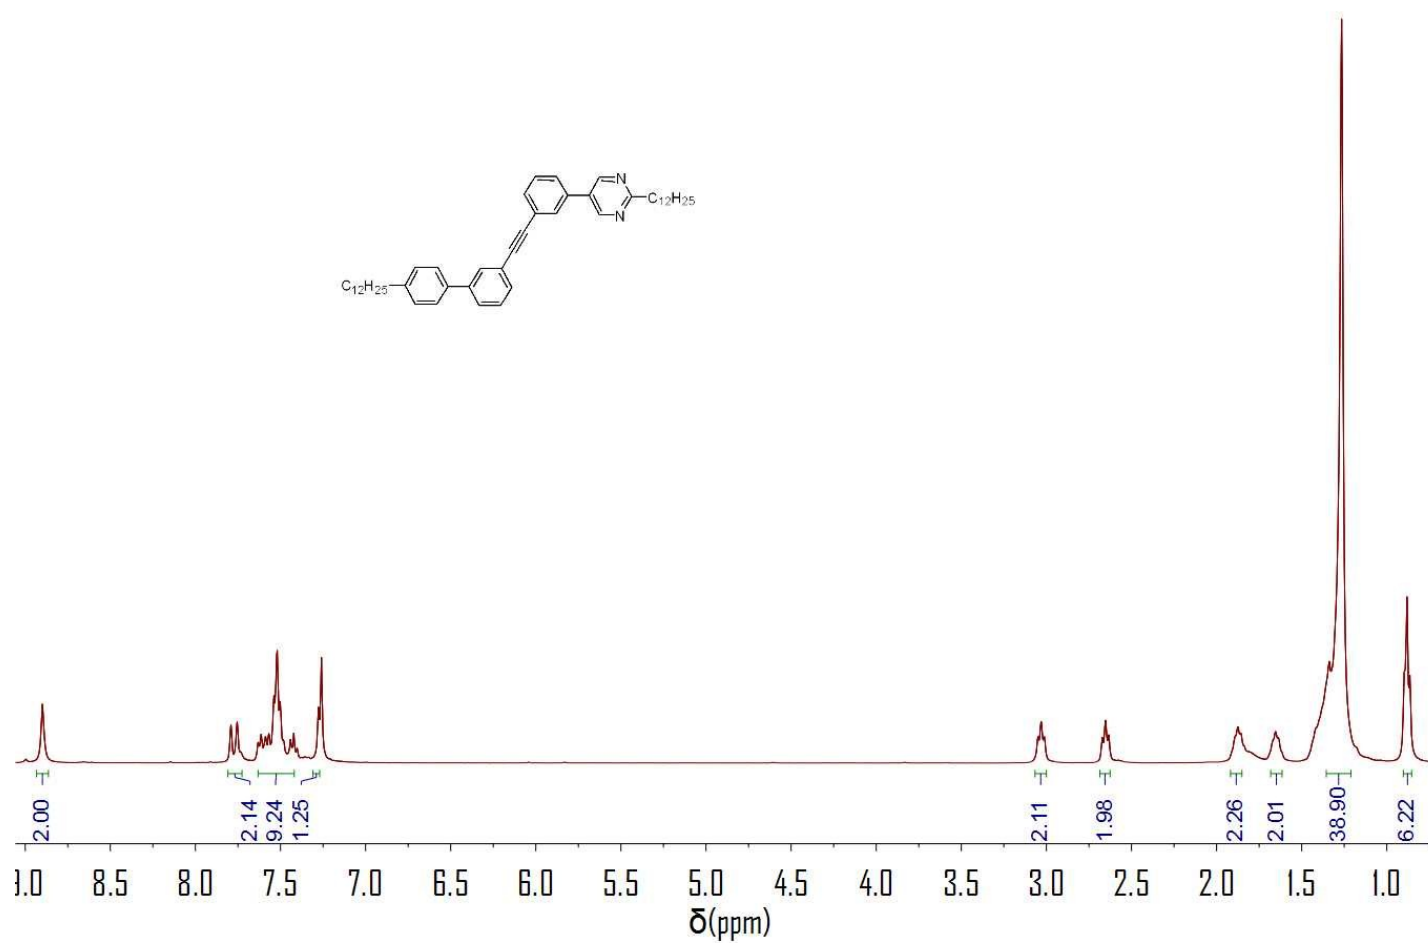

Figure S14. <sup>1</sup>H NMR spectra of **15** (400 MHz, CDCl<sub>3</sub>).

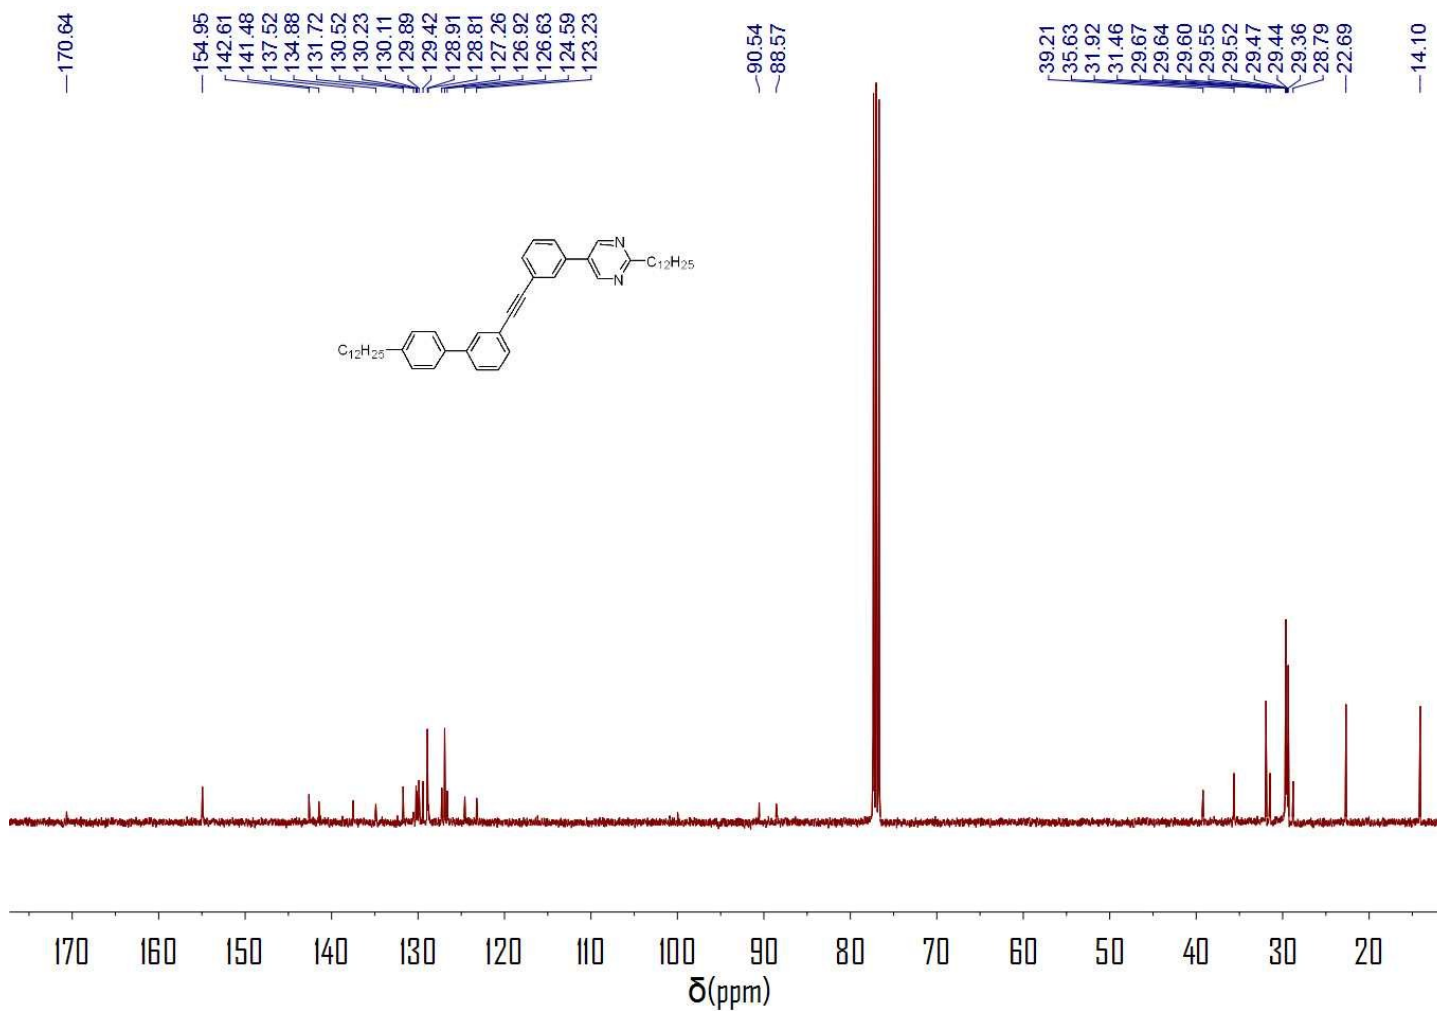

Figure S15.  $^{13}\text{C}$  NMR spectra of **15** (400 MHz,  $\text{CDCl}_3$ ).



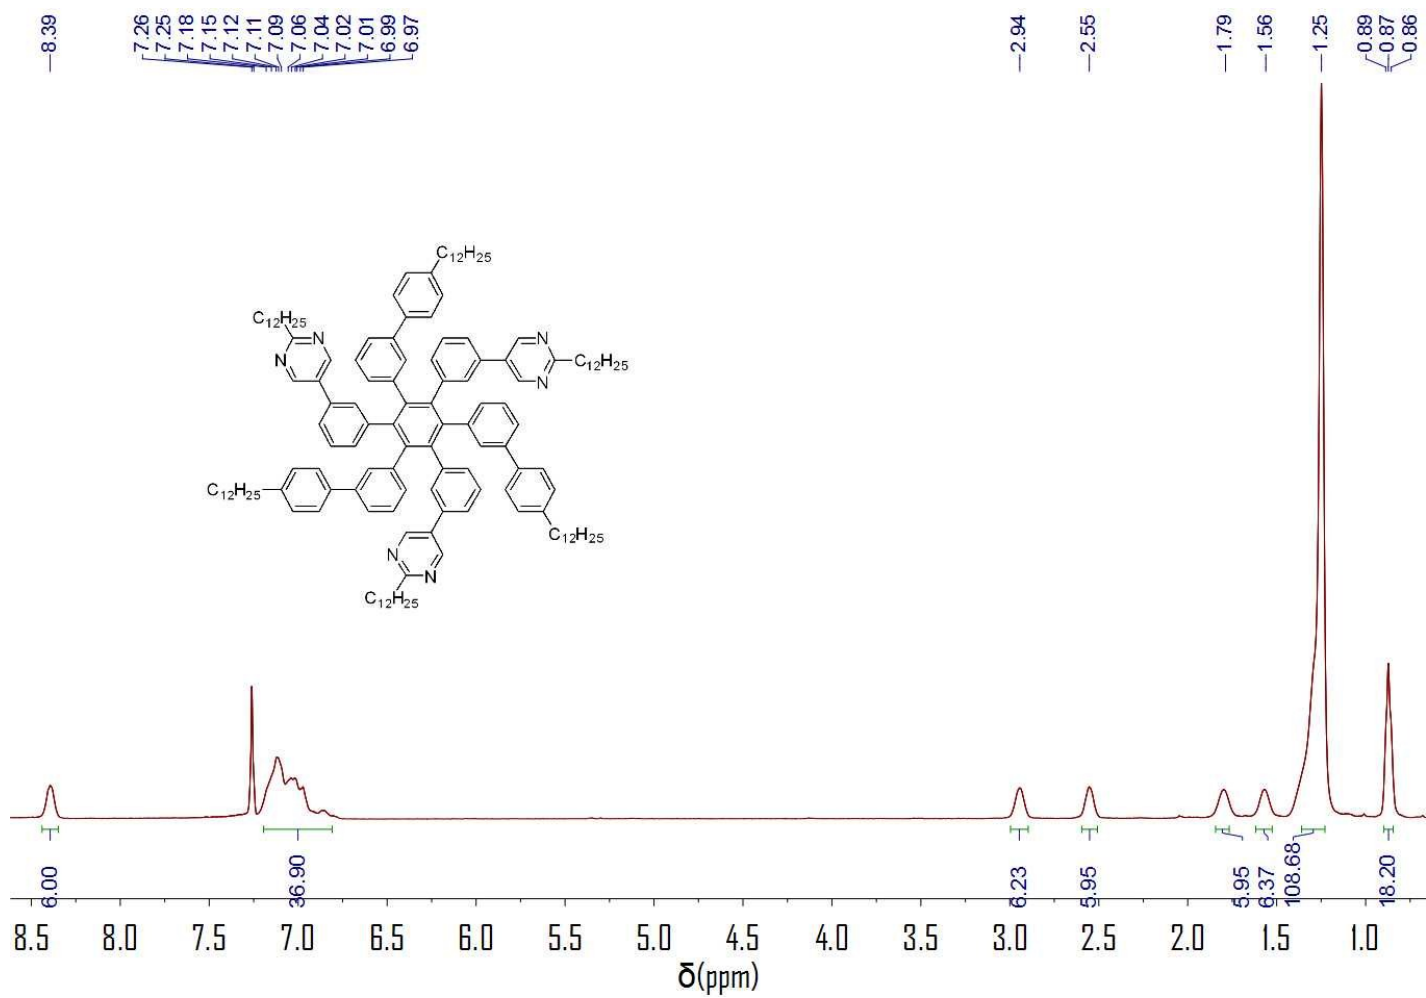

Figure S16.  $^1H$  NMR spectra of **2** (400 MHz,  $CDCl_3$ ).

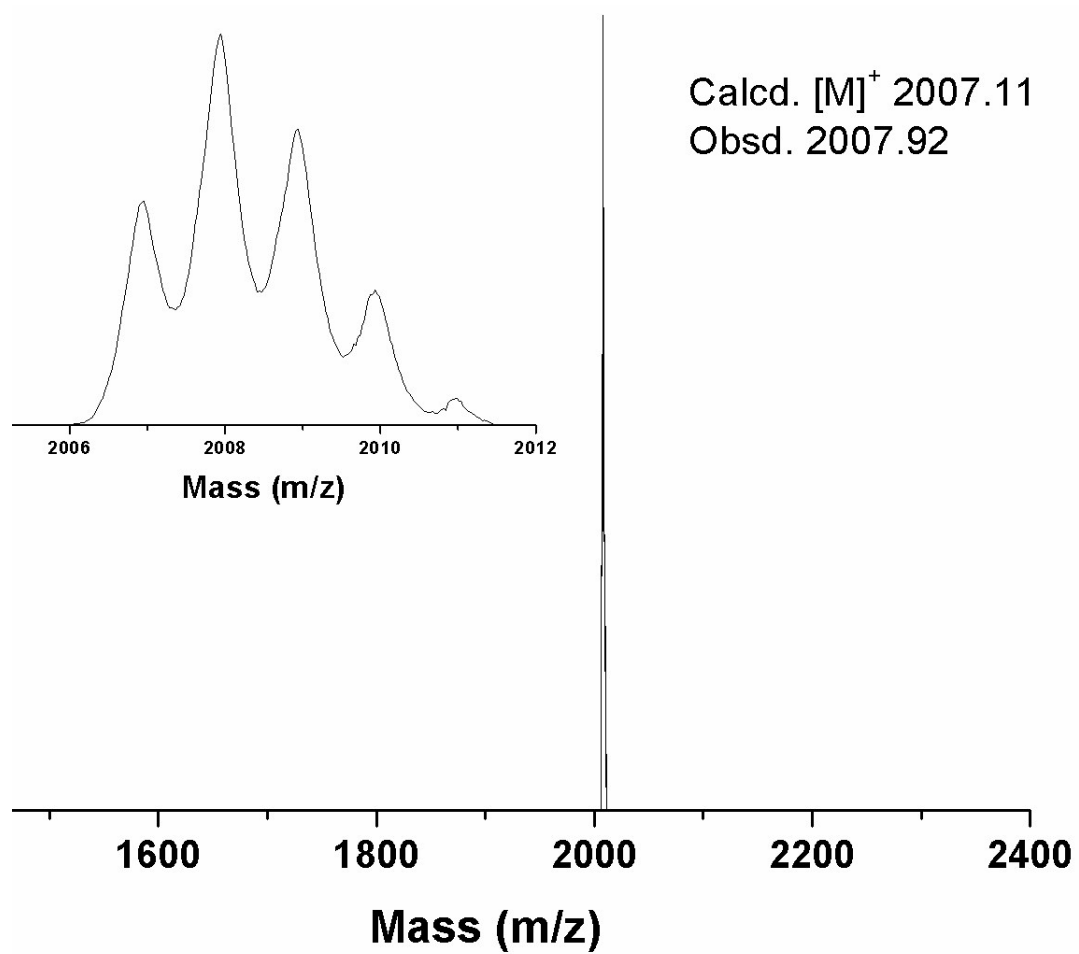

Figure S17. MALDI-TOF mass spectrum of 2.

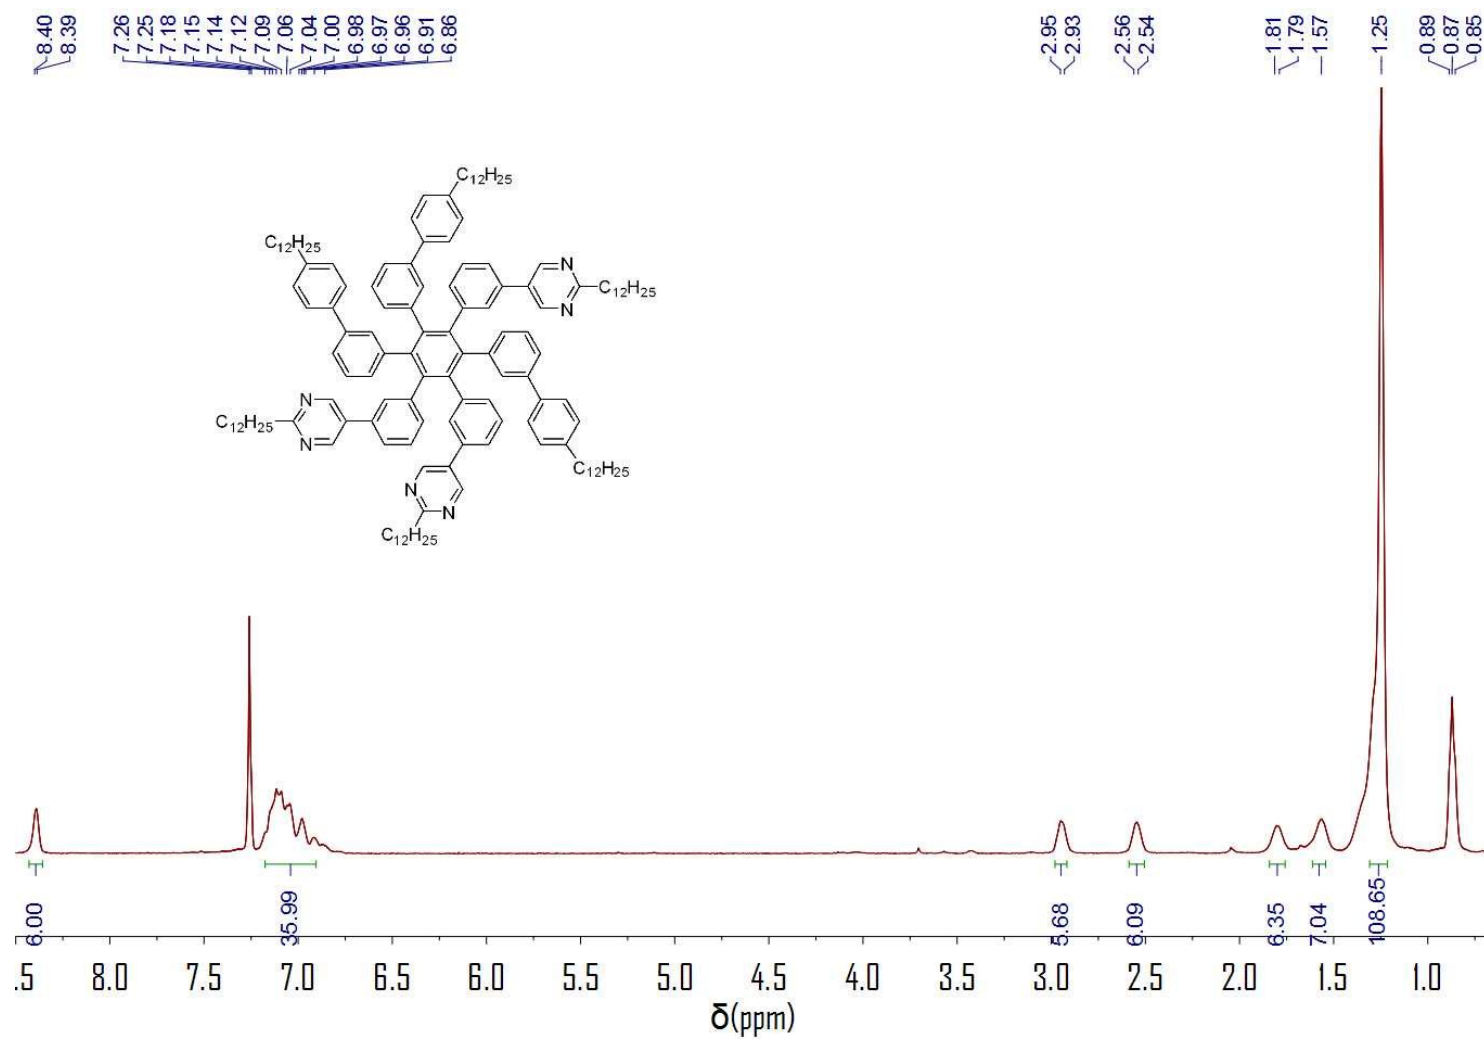

Figure S18.  $^1\text{H}$  NMR spectra of **3** (400 MHz,  $\text{CDCl}_3$ ).

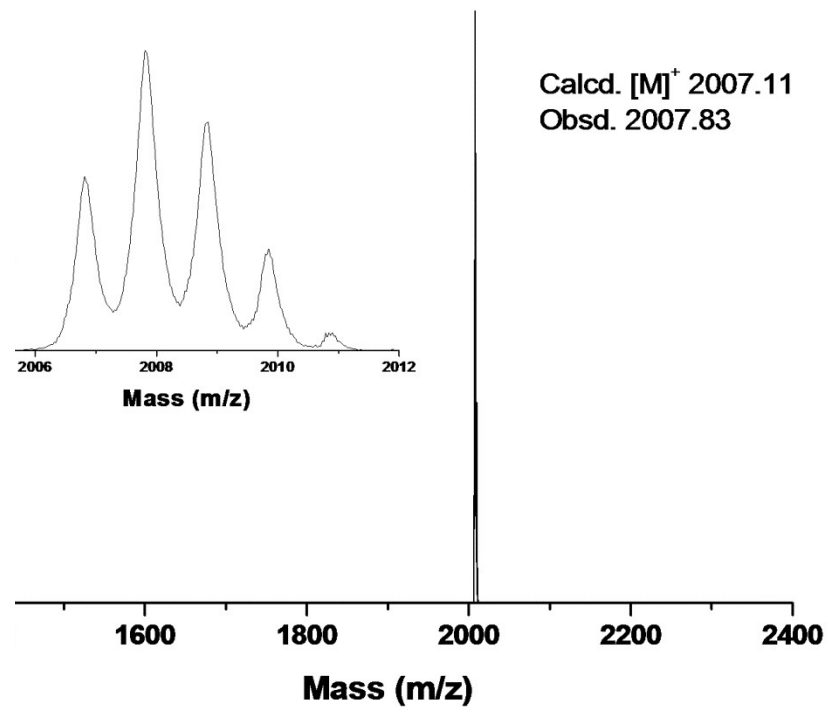

Figure S19. MALDI-TOF mass spectrum of **3**.

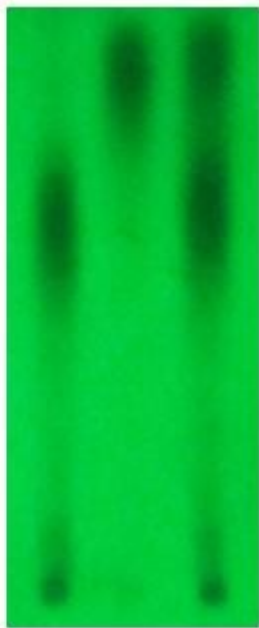

Figure S20.  $R_f$  value of **2** (middle), **3** (left), the mixture of **2** and **3** (right) in thin-layer chromatography ( $\text{SiO}_2$ , PE:DCM:EA = 10:10:1).
